# Supplementary material for: Copy Number Variation Discovery in South African Nguni-Sired and Bonsmara-Sired Crossbred Cattle
Source: MDPI journal article supplement (doi:10.3390/ani13152513), 2023-08-03
Supplement: s1 [file s1]

# Copy Number Variation Discovery in South African Nguni-Sired and Bonsmara-Sired Crossbred Cattle

Bhaveni B. Kooverjee, Pranisha Soma , Magrieta A. van der Nest, Michiel M. Scholtz and Frederick W. C. Naser

**Table S1.** Information on the crossbred animals used in this study.

| <b>Individual</b> | <b>SEX</b> | <b>Birth Weight<br/>(Kg)</b> | <b>Date of Birth</b> |
|-------------------|------------|------------------------------|----------------------|
| NxB1              | Male       | 40                           | 15-09-2019           |
| NxB2              | Male       | 38                           | 18-09-2019           |
| BxN3              | Male       | 30                           | 17-10-2017           |
| BxN4              | Male       | 40                           | 18-09-2019           |
| BxN5              | Male       | 35                           | 21-09-2019           |

**Table S2.** Sequencing depth and mapped reads of Nguni sired and Bonsmara sired crossbreds.

| <b>Individual</b> | <b>Total Reads</b> | <b>Mapped reads</b> | <b>Mapped (%)</b> | <b>Depth</b> |
|-------------------|--------------------|---------------------|-------------------|--------------|
| NxB1              | 368,197,623        | 344,442,160         | 93.5              | 18.32        |
| NxB2              | 335,282,240        | 314,851,328         | 93.9              | 15.91        |
| BxN3              | 405,525,929        | 382,409,166         | 94.3              | 19.80        |
| BxN4              | 294,132,129        | 275,079,007         | 93.5              | 14.74        |
| BxN5              | 115,698,956        | 106,944,169         | 92.4              | 5.51         |

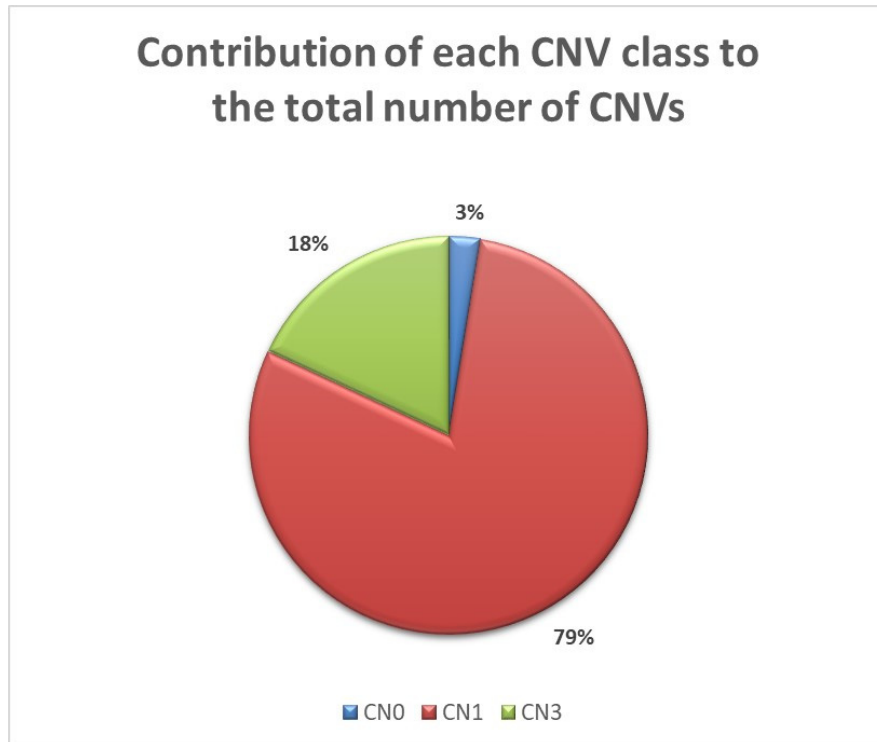

**Figure S1.** CNV summary statistics of Copy number (CN) and number of CNVs for each CN class. Where losses are represented by CN0 = double copy deletion, CN1 = single copy deletion and gains are represented by CN3 = single copy duplication.

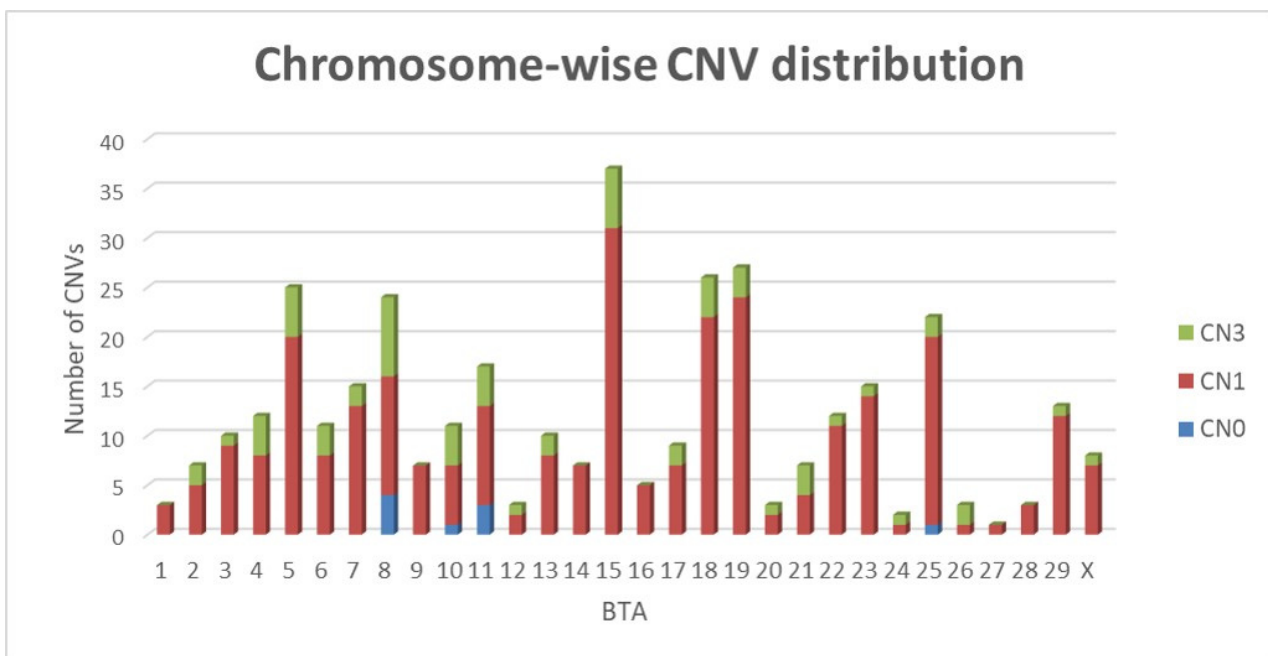

**Figure S2.** Bar plot displaying the contribution of each copy number class to the total number of CNV calls per chromosome for all crossbred individuals. CN0 (blue) and CN1 (red) represents the double and single copy number deletion events (losses), respectively. CN3 (green) represents the single duplication copy number events (gains).

**Table S3.** All the CNVs detected in the crossbreds.

| Individual | BTA | Gene         | Gene Symbol  | Gene Full Name                                                            | Start bp  | End bp    | RC    | medRC  | RC.nor | medRC.nor | RC.ratio | CN  | Window |
|------------|-----|--------------|--------------|---------------------------------------------------------------------------|-----------|-----------|-------|--------|--------|-----------|----------|-----|--------|
| BxN5       | 1   | XP_019813263 | FAM43A       | family with sequence similarity 43 member A                               | 74249656  | 74250927  | 27    | 144    | 54     | 94        | 0,57     | CN1 | -1     |
| NxB1       | 1   | XP_019820562 | LOC109562066 | keratin-associated protein 21-1-like                                      | 4007816   | 4008130   | 50    | 62.5   | 45     | 72        | 0.62     | CN1 | -1     |
| BxN5       | 1   | XP_019820600 | LOC109562086 | keratin-associated protein 21-1-like                                      | 4053048   | 4053362   | 9     | 50     | 18     | 33        | 0,55     | CN1 | -1     |
| BxN5       | 2   | XP_019824679 | LOC109565286 | ras-related GTP-binding protein C-like                                    | 5147265   | 5148466   | 24    | 124    | 48     | 82        | 0,59     | CN1 | -1     |
| NxB1       | 2   | XP_019833198 | LOC109571278 | 40S ribosomal protein S6                                                  | 115460800 | 115461594 | 67    | 108    | 60     | 95        | 0.63     | CN1 | -1     |
| BxN5       | 2   | XP_019840999 | LOC109576808 | gamma-crystallin C                                                        | 101469299 | 101471209 | 75    | 164    | 151    | 105       | 1,44     | CN3 | -1     |
| BxN4       | 2   | XP_019825045 | MSTN         | myostatin                                                                 | 6524203   | 6529190   | 644   | 610.5  | 694    | 499       | 1.39     | CN3 | -1     |
| BxN4       | 2   | XP_019836041 | SFN          | stratifin                                                                 | 130454313 | 130455059 | 35    | 81     | 38     | 71        | 0.54     | CN1 | -1     |
| BxN5       | 2   | XP_019841229 | TEX44        | testis expressed 44                                                       | 123376766 | 123377821 | 26    | 122    | 52     | 81        | 0,64     | CN1 | -1     |
| BxN4       | 2   | XP_019835341 | TMEM200B     | transmembrane protein 200B                                                | 128475257 | 128476939 | 63    | 120.5  | 68     | 98        | 0.69     | CN1 | -1     |
| BxN4       | 3   | XP_019810229 | HAX1         | HCLS1 associated protein X-1                                              | 17633636  | 17635983  | 114   | 211    | 123    | 185       | 0.66     | CN1 | -1     |
| BxN4       | 3   | XP_019812844 | LOC109556172 | tetratricopeptide repeat protein 9C-like                                  | 82387281  | 82387796  | 26    | 52     | 28     | 50        | 0.56     | CN1 | -1     |
| BxN4       | 3   | XP_019813083 | LOC109556325 | cytochrome P450 4A25-like                                                 | 106107514 | 106121058 | 1604  | 1498.5 | 1729   | 1182      | 1.46     | CN3 | -1     |
| NxB1       | 3   | XP_019813083 | LOC109556325 | cytochrome P450 4A25-like                                                 | 106107514 | 106121058 | 1393  | 1498.5 | 1245   | 1821      | 0.68     | CN1 | -1     |
| NxB2       | 3   | XP_019813083 | LOC109556325 | cytochrome P450 4A25-like                                                 | 106107514 | 106121058 | 1224  | 1498.5 | 1141   | 1729      | 0.66     | CN1 | -1     |
| BxN4       | 3   | XP_019813637 | LOC109556616 | ubiquitin carboxyl-terminal hydrolase 17-like protein 6                   | 126931388 | 126932989 | 1412  | 2795   | 1522   | 2386      | 0.64     | CN1 | -1     |
| BxN5       | 3   | XP_019813637 | LOC109556616 | ubiquitin carboxyl-terminal hydrolase 17-like protein 6                   | 126931388 | 126932989 | 539   | 2779   | 1085   | 1702      | 0,64     | CN1 | -1     |
| BxN5       | 3   | XP_019844002 | LOC109578994 | T-cell surface glycoprotein CD1e, membrane-associated-like                | 12662087  | 12664934  | 74    | 334    | 149    | 222       | 0,67     | CN1 | -1     |
| BxN5       | 3   | XP_019813174 | RNF220       | ring finger protein 220                                                   | 108232968 | 108269394 | 9535  | 42893  | 1920   | 2853      | 0,67     | CN1 | -1     |
| BxN4       | 3   | XP_019813906 | S100A3       | S100 calcium binding protein A3                                           | 18219995  | 18220729  | 40    | 81     | 43     | 70        | 0.61     | CN1 | -1     |
| NxB1       | 4   | XP_019814763 | CLEC5A       | C-type lectin domain containing 5A                                        | 108903617 | 108914151 | 1855  | 1484.5 | 1658   | 1139      | 1.46     | CN3 | -1     |
| BxN4       | 4   | XP_019815031 | KLF14        | Kruppel like factor 14                                                    | 97691432  | 97692181  | 33    | 74     | 36     | 65        | 0.55     | CN1 | -1     |
| NxB1       | 4   | XP_019814378 | LOC109557480 | small nuclear ribonucleoprotein-associated protein B'-like                | 68630756  | 68632686  | 110   | 173.5  | 98     | 156       | 0.63     | CN1 | -1     |
| BxN5       | 4   | XP_019814597 | LOC109557600 | uncharacterized LOC109557600                                              | 95784146  | 95786909  | 135   | 294    | 272    | 200       | 1,36     | CN3 | -1     |
| BxN4       | 4   | XP_019814765 | LOC109557707 | maltase-glucoamylase, intestinal-like                                     | 108966455 | 108987531 | 1803  | 2980   | 1944   | 2935      | 0.66     | CN1 | -1     |
| NxB1       | 4   | XP_019814765 | LOC109557707 | maltase-glucoamylase, intestinal-like                                     | 108966455 | 108987531 | 3458  | 2980   | 3090   | 2171      | 1.42     | CN3 | -1     |
| BxN4       | 4   | XP_019814767 | LOC109557710 | cationic trypsin                                                          | 109273876 | 109277621 | 171   | 349.5  | 184    | 310       | 0.59     | CN1 | -1     |
| BxN5       | 4   | XP_019815005 | LOC109557911 | metalloreductase STEAP1                                                   | 76723661  | 76729984  | 19    | 106    | 38     | 71        | 0,54     | CN1 | -1     |
| NxB2       | 4   | XP_019815042 | LOC109557960 | olfactory receptor 9A4-like                                               | 108879330 | 108880274 | 107   | 182.5  | 100    | 162       | 0.62     | CN1 | -1     |
| BxN4       | 4   | XP_019815055 | LOC109558007 | olfactory receptor 6V1                                                    | 110368624 | 110369565 | 59    | 126.5  | 64     | 108       | 0.59     | CN1 | -1     |
| BxN4       | 4   | XP_019815157 | TAS2R38      | taste 2 receptor member 38                                                | 108945807 | 108946814 | 93    | 166.5  | 100    | 166       | 0.6      | CN1 | -1     |
| BxN4       | 4   | XP_019814316 | THAP5        | THAP domain containing 5                                                  | 61758291  | 61763340  | 610   | 567    | 658    | 489       | 1.35     | CN3 | -1     |
| BxN5       | 5   | XP_019815805 | C5H12orf57   | chromosome 5 C12orf57 homolog                                             | 10514133  | 10515573  | 31    | 157    | 62     | 104       | 0,6      | CN1 | -1     |
| NxB1       | 5   | XP_019815567 | CCER1        | coiled-coil glutamate rich protein 1                                      | 23549459  | 23550706  | 105   | 121    | 94     | 146       | 0.64     | CN1 | -1     |
| NxB1       | 5   | XP_019816120 | DAZAP2       | DAZ associated protein 2                                                  | 31533772  | 31536630  | 439   | 324.5  | 392    | 279       | 1.41     | CN3 | -1     |
| NxB1       | 5   | XP_019816121 | DAZAP2       | DAZ associated protein 2                                                  | 31533772  | 31536824  | 469   | 349    | 419    | 301       | 1.39     | CN3 | -1     |
| NxB2       | 5   | XP_019815966 | HOXC6        | homeobox C6                                                               | 28862401  | 28863586  | 91    | 126.5  | 85     | 127       | 0.67     | CN1 | -1     |
| BxN4       | 5   | XP_019816528 | INHBE        | inhibin subunit beta E                                                    | 60341758  | 60343051  | 67    | 143    | 72     | 122       | 0.59     | CN1 | -1     |
| BxN4       | 5   | XP_019817230 | KCNA6        | potassium voltage-gated channel subfamily A member 6                      | 112031255 | 112032841 | 65    | 127.5  | 70     | 111       | 0.63     | CN1 | -1     |
| NxB1       | 5   | XP_019815332 | LOC109558319 | antigen WC1.1-like                                                        | 10017212  | 10114187  | 12319 | 16287  | 1101   | 1707      | 0.64     | CN1 | -1     |
| BxN5       | 5   | XP_019815368 | LOC109558369 | olfactory receptor 8S1-like                                               | 34696160  | 34697095  | 56    | 110    | 113    | 79        | 1,43     | CN3 | -1     |
| BxN5       | 5   | XP_019815460 | LOC109558521 | uncharacterized LOC109558521                                              | 79619384  | 79654643  | 197   | 1054   | 397    | 668       | 0,59     | CN1 | -1     |
| BxN5       | 5   | XP_019815485 | LOC109558561 | phosphatidylinositol 4-phosphate 3-kinase C2 domain-containing subunit ga | 98526588  | 98537798  | 39    | 204    | 79     | 136       | 0,58     | CN1 | -1     |
| BxN3       | 5   | XP_019815658 | LOC109558771 | olfactory receptor 6C74-like                                              | 63725804  | 63726742  | 117   | 162    | 101    | 154       | 0.66     | CN1 | -1     |
| BxN5       | 5   | XP_019815774 | LOC109558889 | antigen WC1.1-like                                                        | 9780676   | 9841728   | 554   | 2857   | 1116   | 1730      | 0,65     | CN1 | -1     |
| BxN4       | 5   | XP_019816218 | LOC109559139 | tubulin alpha-1C chain                                                    | 33594487  | 33601814  | 202   | 376.5  | 218    | 305       | 0.71     | CN1 | -1     |
| BxN4       | 5   | XP_019817113 | LOC109559662 | NKG2-A/NKG2-B type II integral membrane protein-like                      | 106435686 | 106440244 | 1330  | 1198   | 1434   | 1057      | 1.36     | CN3 | -1     |
| BxN3       | 5   | XP_019817150 | LOC109559684 | C-type lectin domain family 2 member H-like                               | 107400446 | 107479385 | 2756  | 1631.5 | 2390   | 1645      | 1.45     | CN3 | -1     |
| BxN3       | 5   | XP_019817476 | LOC109559879 | cytochrome P450 2D14                                                      | 120030547 | 120034712 | 192   | 252    | 167    | 309       | 0.54     | CN1 | -1     |

|      |   |              |              |                                                                     |           |           |       |        |       |       |      |     |    |
|------|---|--------------|--------------|---------------------------------------------------------------------|-----------|-----------|-------|--------|-------|-------|------|-----|----|
| BxN4 | 5 | XP_019815531 | MAFF         | MAF bZIP transcription factor F                                     | 116835359 | 116836734 | 79    | 154.5  | 85    | 136   | 0.62 | CN1 | -1 |
| BxN4 | 5 | XP_019816487 | METTL1       | methyltransferase 1, tRNA methylguanosine                           | 60004730  | 60007876  | 191   | 374    | 206   | 327   | 0.63 | CN1 | -1 |
| BxN3 | 5 | XP_019816802 | MTERF2       | mitochondrial transcription termination factor 2                    | 75275935  | 75277092  | 136   | 157.5  | 118   | 170   | 0.69 | CN1 | -1 |
| BxN4 | 5 | XP_019815398 | NXPH4        | neurexophilin 4                                                     | 60605357  | 60606554  | 50    | 119    | 54    | 105   | 0.51 | CN1 | -1 |
| BxN4 | 5 | XP_019816286 | PCED1B       | PC-esterase domain containing 1B                                    | 36235912  | 36237225  | 71    | 151.5  | 77    | 133   | 0.58 | CN1 | -1 |
| BxN5 | 5 | XP_019815562 | PIANP        | PILR alpha associated neural protein                                | 10742532  | 10745390  | 55    | 272    | 111   | 173   | 0,64 | CN1 | -1 |
| BxN4 | 5 | XP_019815980 | TARBP2       | TARBP2 subunit of RISC loading complex                              | 29475440  | 29480377  | 243   | 504.5  | 262   | 448   | 0.58 | CN1 | -1 |
| BxN4 | 5 | XP_019815981 | TARBP2       | TARBP2 subunit of RISC loading complex                              | 29475440  | 29479767  | 226   | 428    | 244   | 375   | 0.65 | CN1 | -1 |
| BxN4 | 6 | XP_019817641 | CYTL1        | cytokine like 1                                                     | 108904094 | 108908353 | 239   | 443.5  | 258   | 390   | 0.66 | CN1 | -1 |
| BxN3 | 6 | XP_019817826 | FABP2        | fatty acid binding protein 2                                        | 6817413   | 6819951   | 507   | 597    | 440   | 648   | 0.68 | CN1 | -1 |
| BxN3 | 6 | XP_019817736 | HMX1         | H6 family homeobox 1                                                | 120888846 | 120892751 | 405   | 243    | 351   | 244   | 1.44 | CN3 | -1 |
| NxB1 | 6 | XP_019817568 | LOC109559966 | rho GTPase-activating protein 20-like                               | 5808805   | 5822529   | 7710  | 5194.5 | 6889  | 5516  | 1.25 | CN3 | -1 |
| NxB1 | 6 | XP_019817569 | LOC109559967 | rho GTPase-activating protein 20-like                               | 5822994   | 5833052   | 3303  | 2318.5 | 2951  | 2302  | 1.28 | CN3 | -1 |
| BxN3 | 6 | XP_019817596 | LOC109560002 | mediator of RNA polymerase II transcription subunit 28-like         | 38069553  | 38076821  | 110   | 138    | 95    | 147   | 0.65 | CN1 | -1 |
| BxN4 | 6 | XP_019818050 | LOC109560354 | cytosol aminopeptidase-like                                         | 38065276  | 38067849  | 56    | 86     | 60    | 100   | 0.6  | CN1 | -1 |
| NxB2 | 6 | XP_019818388 | LOC109560516 | nucleosome assembly protein 1-like 1                                | 86691522  | 86692697  | 110   | 170.5  | 103   | 162   | 0.64 | CN1 | -1 |
| BxN4 | 6 | XP_019818800 | MFSD10       | major facilitator superfamily domain containing 10                  | 120079572 | 120082588 | 124   | 236    | 134   | 196   | 0.68 | CN1 | -1 |
| BxN4 | 6 | XP_019818823 | TADA2B       | transcriptional adaptor 2B                                          | 121678094 | 121679101 | 47    | 94.5   | 51    | 80    | 0.64 | CN1 | -1 |
| BxN5 | 6 | XP_019818658 | ZNF518B      | zinc finger protein 518B                                            | 109967525 | 109970761 | 15    | 81     | 30    | 53    | 0,57 | CN1 | -1 |
| BxN5 | 7 | XP_019820005 | EBI3         | Epstein-Barr virus induced 3                                        | 18446259  | 18452051  | 2474  | 11482  | 498   | 687   | 0,72 | CN1 | -1 |
| BxN4 | 7 | XP_019820558 | EGR1         | early growth response 1                                             | 49108075  | 49110394  | 150   | 283    | 162   | 229   | 0,71 | CN1 | -1 |
| BxN5 | 7 | XP_019818867 | LOC109560819 | uncharacterized LOC109560819                                        | 4894579   | 4910694   | 249   | 1232   | 501   | 811   | 0,62 | CN1 | -1 |
| BxN4 | 7 | XP_019819307 | LOC109561359 | histone H3.1                                                        | 2503035   | 2503445   | 30    | 56     | 32    | 54    | 0,59 | CN1 | -1 |
| BxN4 | 7 | XP_019820074 | LOC109561782 | zinc finger protein 77-like                                         | 19580992  | 19588736  | 49    | 97.5   | 53    | 85    | 0,62 | CN1 | -1 |
| NxB2 | 7 | XP_019820636 | LOC109562121 | protocadherin alpha-10-like                                         | 51355150  | 51357585  | 313   | 244    | 292   | 209   | 1,4  | CN3 | -1 |
| BxN5 | 7 | XP_019819599 | LYL1         | LYL1 basic helix-loop-helix family member                           | 10739244  | 10741251  | 41    | 198    | 83    | 132   | 0,63 | CN1 | -1 |
| BxN5 | 7 | XP_019819811 | MCEMP1       | mast cell expressed membrane protein 1                              | 14972950  | 14975102  | 88    | 191    | 177   | 127   | 1,39 | CN3 | -1 |
| BxN5 | 7 | XP_019820419 | MIDN         | midnolin                                                            | 42746072  | 42751923  | 108   | 497    | 217   | 331   | 0,66 | CN1 | -1 |
| BxN4 | 7 | XP_019819587 | NACC1        | nucleus accumbens associated 1                                      | 10710470  | 10713504  | 145   | 287.5  | 156   | 249   | 0,63 | CN1 | -1 |
| BxN4 | 7 | XP_019819760 | PLPPR2       | phospholipid phosphatase related 2                                  | 14214349  | 14218821  | 259   | 484    | 279   | 389   | 0,72 | CN1 | -1 |
| BxN5 | 7 | XP_019819844 | RPS28        | ribosomal protein S28                                               | 15428095  | 15428909  | 19    | 94     | 38    | 63    | 0,6  | CN1 | -1 |
| BxN4 | 7 | XP_019819055 | SOWAHA       | sosondowah ankyrin repeat domain family member A                    | 44081575  | 44083470  | 85    | 190.5  | 92    | 169   | 0,54 | CN1 | -1 |
| BxN4 | 7 | XP_019819380 | TMEM59L      | transmembrane protein 59 like                                       | 4503872   | 4509183   | 299   | 571.5  | 322   | 476   | 0,68 | CN1 | -1 |
| BxN5 | 7 | XP_019819386 | UBA52        | ubiquitin A-52 residue ribosomal protein fusion product 1           | 4530808   | 4532137   | 35    | 175    | 70    | 114   | 0,61 | CN1 | -1 |
| BxN5 | 8 | XP_019822073 | C8H9orf153   | chromosome 8 C9orf153 homolog                                       | 83534817  | 83537090  | 54    | 260    | 109   | 173   | 0,63 | CN1 | -1 |
| NxB2 | 8 | XP_019822001 | ENHO         | energy homeostasis associated                                       | 80116078  | 80116308  | 27    | 47.5   | 25    | 44    | 0,57 | CN1 | -1 |
| NxB1 | 8 | XP_019821381 | HMBOX1       | homeobox containing 1                                               | 9713354   | 9824225   | 2E+05 | 208758 | 13595 | 19427 | 0,7  | CN0 | -1 |
| NxB1 | 8 | XP_019821384 | HMBOX1       | homeobox containing 1                                               | 9715044   | 9824225   | 2E+05 | 208593 | 13576 | 19411 | 0,7  | CN0 | -1 |
| NxB2 | 8 | XP_019821381 | HMBOX1       | homeobox containing 1                                               | 9713354   | 9824225   | 3E+05 | 208758 | 25505 | 19200 | 1,33 | CN0 | -1 |
| NxB2 | 8 | XP_019821384 | HMBOX1       | homeobox containing 1                                               | 9715044   | 9824225   | 3E+05 | 208593 | 25491 | 19185 | 1,33 | CN0 | -1 |
| NxB1 | 8 | XP_019821073 | LOC109562432 | disintegrin and metalloproteinase domain-containing protein 20-like | 7212767   | 7215055   | 931   | 749    | 832   | 577   | 1,44 | CN3 | -1 |
| NxB2 | 8 | XP_019821073 | LOC109562432 | disintegrin and metalloproteinase domain-containing protein 20-like | 7212767   | 7215055   | 819   | 749    | 764   | 548   | 1,39 | CN3 | -1 |
| NxB2 | 8 | XP_019821200 | LOC109562612 | grpE protein homolog 2, mitochondrial-like                          | 1439169   | 1440208   | 68    | 106.5  | 63    | 101   | 0,62 | CN1 | -1 |
| BxN4 | 8 | XP_019821233 | LOC109562645 | interferon omega-1-like                                             | 24200072  | 24200659  | 37    | 73.5   | 40    | 64    | 0,62 | CN1 | -1 |
| BxN4 | 8 | XP_019821255 | LOC109562668 | interferon alpha-2-like                                             | 24509468  | 24510028  | 74    | 139    | 80    | 126   | 0,63 | CN1 | -1 |
| BxN3 | 8 | XP_019821258 | LOC109562673 | interferon alpha-3-like                                             | 24738447  | 24738920  | 60    | 72.5   | 52    | 88    | 0,59 | CN1 | -1 |
| BxN4 | 8 | XP_019821267 | LOC109562689 | GTP-binding nuclear protein Ran-like                                | 57079946  | 57080599  | 49    | 89     | 53    | 91    | 0,58 | CN1 | -1 |
| BxN4 | 8 | XP_019821896 | LOC109563117 | tumor necrosis factor receptor superfamily member 10A-like          | 73381780  | 73438288  | 4889  | 4605   | 5271  | 4029  | 1,31 | CN3 | -1 |
| BxN4 | 8 | XP_019821892 | LOC109563117 | tumor necrosis factor receptor superfamily member 10A-like          | 73381860  | 73438288  | 4877  | 4582.5 | 5258  | 3998  | 1,32 | CN3 | -1 |

|      |    |              |              |                                                              |           |           |       |        |       |       |      |     |    |
|------|----|--------------|--------------|--------------------------------------------------------------|-----------|-----------|-------|--------|-------|-------|------|-----|----|
| BxN4 | 8  | XP_019821895 | LOC109563117 | tumor necrosis factor receptor superfamily member 10A-like   | 73383400  | 73438288  | 4783  | 4482   | 5157  | 3898  | 1.32 | CN3 | -1 |
| NxB1 | 8  | XP_019821894 | LOC109563117 | tumor necrosis factor receptor superfamily member 10A-like   | 73406726  | 73438288  | 2462  | 2832   | 2200  | 3590  | 0.61 | CN1 | -1 |
| NxB2 | 8  | XP_019821894 | LOC109563117 | tumor necrosis factor receptor superfamily member 10A-like   | 73406726  | 73438288  | 2502  | 2832   | 2333  | 3409  | 0.68 | CN1 | -1 |
| BxN3 | 8  | XP_019821902 | LOC109563119 | tumor necrosis factor receptor superfamily member 10B-like   | 73221637  | 73251777  | 4609  | 3226.5 | 3997  | 3106  | 1.29 | CN3 | -1 |
| NxB1 | 8  | XP_019821901 | LOC109563119 | tumor necrosis factor receptor superfamily member 10B-like   | 73221637  | 73228860  | 581   | 622    | 519   | 750   | 0.69 | CN1 | -1 |
| NxB1 | 8  | XP_019821902 | LOC109563119 | tumor necrosis factor receptor superfamily member 10B-like   | 73221637  | 73251777  | 2567  | 3226.5 | 2294  | 3739  | 0.61 | CN1 | -1 |
| BxN3 | 8  | XP_019821906 | LOC109563126 | uncharacterized LOC109563126                                 | 73877381  | 73878288  | 180   | 116    | 156   | 110   | 1.42 | CN3 | -1 |
| BxN3 | 8  | XP_019821910 | LOC109563126 | uncharacterized LOC109563126                                 | 73875671  | 73878288  | 245   | 149    | 212   | 147   | 1.44 | CN3 | -1 |
| BxN4 | 8  | XP_019821208 | TMEM215      | transmembrane protein 215                                    | 11423506  | 11424213  | 54    | 99     | 58    | 91    | 0.64 | CN1 | -1 |
| BxN4 | 9  | XP_019822476 | LOC109563531 | protein LEG1 homolog                                         | 67613842  | 67621192  | 450   | 850.5  | 485   | 752   | 0.64 | CN1 | -1 |
| BxN5 | 9  | XP_019822522 | LOC109563604 | mucin-5B-like                                                | 105112850 | 105115207 | 45    | 225    | 91    | 142   | 0,64 | CN1 | -1 |
| BxN4 | 9  | XP_019822571 | LOC109563685 | probable plastid-lipid-associated protein 3, chloroplastic [ | 106343904 | 106344800 | 37    | 80     | 40    | 70    | 0.57 | CN1 | -1 |
| BxN5 | 9  | XP_019822571 | LOC109563685 | probable plastid-lipid-associated protein 3, chloroplastic [ | 106343904 | 106344800 | 14    | 77     | 28    | 50    | 0,56 | CN1 | -1 |
| BxN4 | 9  | XP_019823118 | LOC109564019 | NKG2D ligand 3-like                                          | 87674881  | 87684782  | 985   | 2140.5 | 1062  | 1855  | 0.57 | CN1 | -1 |
| BxN5 | 9  | XP_019823143 | LOC109564041 | NKG2D ligand 4-like                                          | 90335088  | 90337723  | 250   | 1197   | 503   | 740   | 0,68 | CN1 | -1 |
| BxN4 | 9  | XP_019822733 | TSPYL4       | TSPY like 4                                                  | 36168343  | 36169587  | 77    | 132.5  | 83    | 127   | 0.65 | CN1 | -1 |
| BxN5 | 10 | XP_019824197 | ARF6         | ADP ribosylation factor 6                                    | 42932396  | 42932923  | 12    | 64     | 24    | 43    | 0,56 | CN1 | -1 |
| BxN5 | 10 | XP_019823909 | C10H14orf119 | chromosome 10 C14orf119 homolog                              | 22050282  | 22050710  | 20    | 97     | 40    | 65    | 0,62 | CN1 | -1 |
| BxN5 | 10 | XP_019824157 | CAPN3        | calpain 3                                                    | 37624364  | 37680896  | 39392 | 191941 | 7933  | 11901 | 0,67 | CN0 | -1 |
| BxN4 | 10 | XP_019824789 | ISCA2        | iron-sulfur cluster assembly 2                               | 88182226  | 88183504  | 81    | 151    | 87    | 145   | 0.6  | CN1 | -1 |
| BxN3 | 10 | XP_019823312 | LOC109564212 | histone H2B 1/2-like                                         | 22761651  | 22763417  | 141   | 160    | 122   | 186   | 0.66 | CN1 | -1 |
| NxB2 | 10 | XP_019823350 | LOC109564304 | olfactory receptor 4K13-like                                 | 26979380  | 26980318  | 87    | 117.5  | 81    | 125   | 0.65 | CN1 | -1 |
| BxN4 | 10 | XP_019823479 | LOC109564486 | olfactory receptor 11H4                                      | 26236942  | 26237886  | 71    | 137    | 77    | 121   | 0.64 | CN1 | -1 |
| NxB1 | 10 | XP_019823489 | LOC109564499 | olfactory receptor 4M1                                       | 26591155  | 26592114  | 168   | 109.5  | 150   | 110   | 1.36 | CN3 | -1 |
| BxN4 | 10 | XP_019823491 | LOC109564501 | olfactory receptor 4N5                                       | 26618628  | 26619554  | 190   | 185    | 205   | 153   | 1.34 | CN3 | -1 |
| BxN5 | 10 | XP_019823537 | LOC109564562 | olfactory receptor 4E1                                       | 24903574  | 24904587  | 57    | 115    | 115   | 79    | 1,46 | CN3 | -1 |
| BxN4 | 10 | XP_019824347 | LOC109565103 | protogenin-like                                              | 55620080  | 55623510  | 446   | 424    | 481   | 375   | 1.28 | CN3 | -1 |
| BxN5 | 11 | XP_019825118 | CERCAM       | cerebral endothelial cell adhesion molecule                  | 102653730 | 102662859 | 118   | 604    | 238   | 394   | 0,6  | CN1 | -1 |
| BxN3 | 11 | XP_019826164 | DNMT3A       | DNA (cytosine-5) methyltransferase 3 alpha                   | 76202981  | 76273343  | 8E+05 | 800100 | 71537 | 74050 | 0.97 | CN0 | -1 |
| BxN5 | 11 | XP_019826164 | DNMT3A       | DNA (cytosine-5) methyltransferase 3 alpha                   | 76202981  | 76273343  | 2E+05 | 775296 | 36377 | 46938 | 0,78 | CN0 | -1 |
| NxB2 | 11 | XP_019826164 | DNMT3A       | DNA (cytosine-5) methyltransferase 3 alpha                   | 76202981  | 76273343  | 8E+05 | 800100 | 78814 | 72766 | 1.08 | CN0 | -1 |
| BxN4 | 11 | XP_019825176 | EGR4         | early growth response 4                                      | 11617289  | 11619138  | 108   | 205.5  | 116   | 171   | 0.68 | CN1 | -1 |
| BxN5 | 11 | XP_019826672 | ENTR1        | endosome associated trafficking regulator 1                  | 107850302 | 107853210 | 58    | 278    | 117   | 185   | 0,63 | CN1 | -1 |
| BxN4 | 11 | XP_019825581 | GEMIN6       | gem nuclear organelle associated protein 6                   | 22337093  | 22340023  | 362   | 338    | 390   | 266   | 1.47 | CN3 | -1 |
| BxN5 | 11 | XP_019826351 | GPR21        | G protein-coupled receptor 21                                | 97423868  | 97424917  | 23    | 112    | 46    | 74    | 0,62 | CN1 | -1 |
| BxN4 | 11 | XP_019825429 | HTRA2        | HtrA serine peptidase 2                                      | 10412204  | 10415095  | 319   | 295.5  | 344   | 231   | 1.49 | CN3 | -1 |
| BxN5 | 11 | XP_019825029 | LOC109565543 | neurexin-1-like                                              | 34836267  | 34837052  | 16    | 88     | 32    | 56    | 0,57 | CN1 | -1 |
| BxN5 | 11 | XP_019825086 | LOC109565622 | olfactory receptor 1J4-like                                  | 96636770  | 96637711  | 27    | 119    | 54    | 86    | 0,63 | CN1 | -1 |
| BxN4 | 11 | XP_019825089 | LOC109565626 | olfactory receptor 50-like                                   | 96749630  | 96750565  | 43    | 84.5   | 46    | 74    | 0.62 | CN1 | -1 |
| BxN3 | 11 | XP_019825151 | LOC109565688 | apical endosomal glycoprotein-like                           | 109474934 | 109482420 | 924   | 566    | 801   | 601   | 1.33 | CN3 | -1 |
| BxN4 | 11 | XP_019825203 | LOC109565727 | zinc finger protein 2                                        | 22211118  | 2225630   | 316   | 581    | 341   | 503   | 0.68 | CN1 | -1 |
| NxB2 | 11 | XP_019826504 | LOC109566513 | long-chain fatty acid transport protein 4-like               | 102711159 | 102722911 | 96    | 190.5  | 90    | 170   | 0.53 | CN1 | -1 |
| BxN4 | 11 | XP_019826185 | PFN4         | profilin family member 4                                     | 77202115  | 77204722  | 345   | 323    | 372   | 265   | 1.4  | CN3 | -1 |
| BxN4 | 11 | XP_019825894 | SH2D6        | SH2 domain containing 6                                      | 51385146  | 51387599  | 127   | 256.5  | 137   | 226   | 0.61 | CN1 | -1 |
| BxN5 | 12 | XP_019827392 | LOC109567086 | multidrug resistance-associated protein 4-like               | 70533917  | 70565176  | 2348  | 12241  | 473   | 751   | 0,63 | CN1 | -1 |
| NxB1 | 12 | XP_019827286 | MLNR         | motilin receptor                                             | 18236311  | 18238948  | 168   | 231    | 150   | 226   | 0.66 | CN1 | -1 |
| BxN5 | 12 | XP_019827353 | TMEM255B     | transmembrane protein 255B                                   | 85045338  | 85062011  | 704   | 1306   | 1418  | 995   | 1,43 | CN3 | -1 |
| BxN5 | 13 | XP_019828244 | BIRC7        | baculoviral IAP repeat containing 7                          | 55001360  | 55004660  | 58    | 287    | 117   | 191   | 0,61 | CN1 | -1 |
| BxN5 | 13 | XP_019828054 | CTSA         | cathepsin A                                                  | 75435747  | 75441921  | 112   | 534    | 226   | 355   | 0,64 | CN1 | -1 |
| NxB1 | 13 | XP_019828023 | DBNDD2       | dysbindin domain containing 2                                | 74514554  | 74516554  | 284   | 195.5  | 254   | 190   | 1.34 | CN3 | -1 |

|      |    |              |              |                                                        |          |          |       |        |      |      |      |     |    |
|------|----|--------------|--------------|--------------------------------------------------------|----------|----------|-------|--------|------|------|------|-----|----|
| BxN5 | 13 | XP_019827598 | LIME1        | Lck interacting transmembrane adaptor 1                | 54711167 | 54712585 | 35    | 173    | 70   | 108  | 0,65 | CN1 | -1 |
| BxN5 | 13 | XP_019828216 | LOC109567625 | histone H2B type 2-E-like                              | 43219513 | 43225045 | 36    | 193    | 72   | 125  | 0,58 | CN1 | -1 |
| NxB2 | 13 | XP_019828362 | LOC109567781 | uncharacterized LOC109567781                           | 74056308 | 74058416 | 218   | 398    | 203  | 351  | 0,58 | CN1 | -1 |
| NxB2 | 13 | XP_019828506 | LOC109567899 | ankyrin repeat domain-containing protein 26-like       | 16741240 | 16746777 | 1706  | 1239.5 | 1591 | 1187 | 1.34 | CN3 | -1 |
| BxN5 | 13 | XP_019828833 | LOC109568059 | uncharacterized LOC109568059                           | 42729753 | 42732785 | 62    | 300    | 125  | 182  | 0,69 | CN1 | -1 |
| BxN4 | 13 | XP_019828385 | NKX2-2       | NK2 homeobox 2                                         | 40884421 | 40886143 | 87    | 173    | 94   | 148  | 0,64 | CN1 | -1 |
| NxB1 | 13 | XP_019828600 | OTUD1        | OTU deubiquitinase 1                                   | 23824374 | 23825819 | 55    | 76     | 49   | 83   | 0,59 | CN1 | -1 |
| BxN4 | 14 | XP_019828992 | FAM110B      | family with sequence similarity 110 member B           | 24298166 | 24299245 | 40    | 79     | 43   | 66   | 0,65 | CN1 | -1 |
| BxN4 | 14 | XP_019829501 | LOC109568570 | uncharacterized LOC109568570                           | 6542185  | 6543454  | 57    | 113.5  | 61   | 94   | 0,65 | CN1 | -1 |
| BxN5 | 14 | XP_019829248 | LY6E         | lymphocyte antigen 6 family member E                   | 1387907  | 1388658  | 14    | 73     | 28   | 49   | 0,57 | CN1 | -1 |
| BxN4 | 14 | XP_019829224 | MAF1         | MAF1 homolog, negative regulator of RNA polymerase III | 564233   | 565697   | 96    | 167.5  | 104  | 160  | 0,65 | CN1 | -1 |
| BxN5 | 14 | XP_019829224 | MAF1         | MAF1 homolog, negative regulator of RNA polymerase III | 564233   | 565697   | 33    | 163    | 66   | 114  | 0,58 | CN1 | -1 |
| BxN4 | 14 | XP_019829592 | RRS1         | ribosome biogenesis regulator 1 homolog                | 30643062 | 30644159 | 60    | 119.5  | 65   | 104  | 0,62 | CN1 | -1 |
| BxN4 | 14 | XP_019829502 | TRMT12       | tRNA methyltransferase 12 homolog                      | 15173091 | 15174479 | 91    | 167    | 98   | 154  | 0,64 | CN1 | -1 |
| BxN5 | 15 | XP_019830754 | APOA5        | apolipoprotein A5                                      | 25983416 | 25985345 | 45    | 210    | 91   | 140  | 0,65 | CN1 | -1 |
| BxN5 | 15 | XP_019830888 | FCHSD2       | FCH and double SH3 domains 2                           | 52052204 | 52326376 | 20013 | 89784  | 4030 | 5972 | 0,67 | CN1 | -1 |
| BxN3 | 15 | XP_019831373 | LIPT2        | lipoyl(octanoyl) transferase 2                         | 53580446 | 53581649 | 192   | 114    | 167  | 119  | 1.4  | CN3 | -1 |
| BxN3 | 15 | XP_019829769 | LOC109568831 | olfactory receptor 10A3-like                           | 43878088 | 43880848 | 63    | 72     | 55   | 81   | 0,68 | CN1 | -1 |
| BxN4 | 15 | XP_019829775 | LOC109568839 | olfactory receptor 478-like                            | 44101176 | 44102105 | 115   | 106    | 124  | 84   | 1.48 | CN3 | -1 |
| BxN4 | 15 | XP_019829798 | LOC109568870 | olfactory receptor 52E4                                | 46524118 | 46525047 | 60    | 115    | 65   | 96   | 0,68 | CN1 | -1 |
| BxN4 | 15 | XP_019829811 | LOC109568885 | putative olfactory receptor 56B2                       | 47127986 | 47128948 | 141   | 127    | 152  | 106  | 1.43 | CN3 | -1 |
| NxB2 | 15 | XP_019829866 | LOC109568958 | olfactory receptor 51H1-like                           | 48985401 | 48986357 | 88    | 129.5  | 82   | 129  | 0,64 | CN1 | -1 |
| BxN5 | 15 | XP_019829894 | LOC109568993 | olfactory receptor 51A7-like                           | 49696052 | 49706104 | 46    | 240    | 93   | 160  | 0,58 | CN1 | -1 |
| BxN4 | 15 | XP_019829971 | LOC109569096 | olfactory receptor 8J2-like                            | 79715418 | 79716371 | 83    | 164    | 89   | 143  | 0,62 | CN1 | -1 |
| BxN4 | 15 | XP_019829974 | LOC109569100 | olfactory receptor 8K3-like                            | 79752995 | 79760771 | 421   | 859.5  | 454  | 752  | 0,6  | CN1 | -1 |
| BxN4 | 15 | XP_019829979 | LOC109569104 | olfactory receptor 8K5-like                            | 79852599 | 79861689 | 371   | 559    | 400  | 616  | 0,65 | CN1 | -1 |
| BxN4 | 15 | XP_019829984 | LOC109569112 | olfactory receptor 1044                                | 79951410 | 79959360 | 112   | 163    | 121  | 190  | 0,64 | CN1 | -1 |
| BxN4 | 15 | XP_019829985 | LOC109569114 | olfactory receptor 8J1-like                            | 80006277 | 80007209 | 46    | 69.5   | 50   | 87   | 0,57 | CN1 | -1 |
| BxN5 | 15 | XP_019829985 | LOC109569114 | olfactory receptor 8J1-like                            | 80006277 | 80007209 | 19    | 46     | 38   | 62   | 0,61 | CN1 | -1 |
| BxN4 | 15 | XP_019829989 | LOC109569117 | olfactory receptor 8K5-like                            | 80033013 | 80042102 | 428   | 711.5  | 461  | 681  | 0,68 | CN1 | -1 |
| NxB1 | 15 | XP_019829989 | LOC109569117 | olfactory receptor 8K5-like                            | 80033013 | 80042102 | 803   | 711.5  | 718  | 503  | 1.43 | CN3 | -1 |
| BxN3 | 15 | XP_019829998 | LOC109569131 | olfactory receptor 5AL1-like                           | 80345343 | 80346293 | 192   | 247    | 167  | 313  | 0,53 | CN1 | -1 |
| BxN4 | 15 | XP_019829998 | LOC109569131 | olfactory receptor 5AL1-like                           | 80345343 | 80346293 | 138   | 247    | 149  | 278  | 0,54 | CN1 | -1 |
| BxN4 | 15 | XP_019830009 | LOC109569143 | olfactory receptor 5AK2-like                           | 80886180 | 80887121 | 52    | 102.5  | 56   | 89   | 0,63 | CN1 | -1 |
| BxN4 | 15 | XP_019830062 | LOC109569192 | ecto-ADP-ribosyltransferase 5                          | 51140201 | 51142085 | 100   | 210    | 108  | 181  | 0,6  | CN1 | -1 |
| BxN4 | 15 | XP_019830065 | LOC109569192 | ecto-ADP-ribosyltransferase 5                          | 51140201 | 51142788 | 125   | 254.5  | 135  | 223  | 0,61 | CN1 | -1 |
| BxN4 | 15 | XP_019830112 | LOC109569234 | olfactory receptor 1440-like                           | 83578635 | 83579579 | 41    | 76     | 44   | 76   | 0,58 | CN1 | -1 |
| NxB2 | 15 | XP_019830121 | LOC109569244 | olfactory receptor 2AT4-like                           | 54106388 | 54107353 | 150   | 123.5  | 140  | 101  | 1.39 | CN3 | -1 |
| BxN5 | 15 | XP_019830139 | LOC109569268 | olfactory receptor 4X2-like                            | 78496038 | 78496967 | 23    | 117    | 46   | 74   | 0,62 | CN1 | -1 |
| BxN4 | 15 | XP_019830195 | LOC109569295 | olfactory receptor 10A4                                | 45233796 | 45234743 | 63    | 122    | 68   | 103  | 0,66 | CN1 | -1 |
| NxB1 | 15 | XP_019830206 | LOC109569309 | olfactory receptor 52N5-like                           | 47034428 | 47035393 | 80    | 109.5  | 71   | 129  | 0,55 | CN1 | -1 |
| BxN5 | 15 | XP_019830214 | LOC109569319 | olfactory receptor 52E1-like                           | 49814660 | 49824477 | 56    | 294    | 113  | 182  | 0,62 | CN1 | -1 |
| BxN4 | 15 | XP_019830216 | LOC109569322 | olfactory receptor 52D1                                | 47728204 | 47729160 | 63    | 128.5  | 68   | 113  | 0,6  | CN1 | -1 |
| BxN4 | 15 | XP_019830292 | LOC109569387 | olfactory receptor 5G3-like                            | 80559526 | 80560470 | 41    | 82     | 44   | 70   | 0,63 | CN1 | -1 |
| NxB1 | 15 | XP_019830355 | LOC109569441 | olfactory receptor 491-like                            | 44134579 | 44135511 | 98    | 145    | 88   | 129  | 0,68 | CN1 | -1 |
| NxB1 | 15 | XP_019830862 | LOC109569680 | tripartite motif-containing protein 5-like             | 47459346 | 47467516 | 738   | 956.5  | 659  | 1062 | 0,62 | CN1 | -1 |
| BxN5 | 15 | XP_019831313 | LOC109569947 | olfactory receptor 9Q2-like                            | 82024837 | 82025781 | 24    | 130    | 48   | 86   | 0,56 | CN1 | -1 |
| NxB2 | 15 | XP_019831319 | LOC109569951 | olfactory receptor 4B1-like                            | 78580892 | 78581821 | 69    | 108.5  | 64   | 101  | 0,63 | CN1 | -1 |
| NxB1 | 15 | XP_019831321 | LOC109569952 | olfactory receptor 4X2-like                            | 78550145 | 78551074 | 69    | 102    | 62   | 97   | 0,64 | CN1 | -1 |
| BxN3 | 15 | XP_019831414 | LOC109570026 | leupaxin                                               | 82720475 | 82721659 | 196   | 135    | 170  | 118  | 1.44 | CN3 | -1 |

|             |           |                     |                |                                                                      |                 |                 |      |        |      |      |      |     |    |
|-------------|-----------|---------------------|----------------|----------------------------------------------------------------------|-----------------|-----------------|------|--------|------|------|------|-----|----|
| NxB2        | 15        | XP_019831422        | LOC109570037   | proteoglycan 3-like                                                  | 81220712        | 81224171        | 721  | 823    | 672  | 992  | 0.68 | CN1 | -1 |
| BxN4        | 16        | XP_019832078        | BTG2           | BTG anti-proliferation factor 2                                      | 76581           | 78445           | 103  | 199.5  | 111  | 176  | 0.63 | CN1 | -1 |
| BxN5        | 16        | XP_019831750        | MXRA8          | matrix remodeling associated 8                                       | 48446584        | 48450076        | 72   | 351    | 145  | 232  | 0,62 | CN1 | -1 |
| BxN5        | 16        | XP_019831515        | TMEM52         | transmembrane protein 52                                             | 48105144        | 48106485        | 29   | 138    | 58   | 92   | 0,63 | CN1 | -1 |
| BxN4        | 16        | XP_019832356        | TNFRSF25       | TNF receptor superfamily member 25                                   | 44111342        | 44115016        | 212  | 390    | 229  | 331  | 0.69 | CN1 | -1 |
| <u>BxN5</u> | <u>16</u> | <u>XP_019832183</u> | <u>TNFRSF4</u> | <u>TNF receptor superfamily member 4</u>                             | <u>48557780</u> | <u>48560363</u> | 59   | 280    | 119  | 182  | 0,65 | CN1 | -1 |
| BxN4        | 17        | XP_019833471        | ARL6IP4        | ADP ribosylation factor like GTPase 6 interacting protein 4          | 55217115        | 55218797        | 99   | 189.5  | 107  | 159  | 0.67 | CN1 | -1 |
| BxN5        | 17        | XP_019833471        | ARL6IP4        | ADP ribosylation factor like GTPase 6 interacting protein 4          | 55217115        | 55218797        | 38   | 170    | 77   | 113  | 0,68 | CN1 | -1 |
| NxB1        | 17        | XP_019833364        | B3GNT4         | UDP-GlcNAc:betaGal beta-1,3-N-acetylglucosaminyltransferase 4        | 55854455        | 55855528        | 81   | 101    | 72   | 121  | 0.6  | CN1 | -1 |
| BxN5        | 17        | XP_019833158        | CFAP73         | cilia and flagella associated protein 73                             | 64373703        | 64379615        | 252  | 557    | 507  | 370  | 1,37 | CN3 | -1 |
| BxN4        | 17        | XP_019832600        | LOC109570913   | 6-pyruvoyl tetrahydrobiopterin synthase-like                         | 56344185        | 56345190        | 141  | 133    | 152  | 106  | 1.43 | CN3 | -1 |
| BxN4        | 17        | XP_019832838        | RHBDD3         | rhomboid domain containing 3                                         | 72003310        | 72006140        | 129  | 272.5  | 139  | 241  | 0.58 | CN1 | -1 |
| BxN5        | 17        | XP_019832776        | RPLP0          | ribosomal protein lateral stalk subunit P0                           | 65830937        | 65834585        | 88   | 431    | 177  | 274  | 0,65 | CN1 | -1 |
| BxN4        | 17        | XP_019832654        | SUSD2          | sushi domain containing 2                                            | 74668046        | 74674410        | 259  | 576    | 279  | 508  | 0.55 | CN1 | -1 |
| BxN4        | 17        | XP_019832750        | ZNF891         | zinc finger protein 891                                              | 46631368        | 46633005        | 129  | 251    | 139  | 216  | 0.64 | CN1 | -1 |
| NxB3        | 18        | XP_019833856        | CA11           | carbonic anhydrase 11                                                | 55101485        | 55107031        | 613  | 371.5  | 532  | 376  | 1.41 | CN3 | -1 |
| NxB2        | 18        | XP_019833996        | CLEC11A        | C-type lectin domain containing 11A                                  | 56740169        | 56742072        | 104  | 171.5  | 97   | 146  | 0.66 | CN1 | -1 |
| BxN4        | 18        | XP_019835304        | DDX28          | DEAD-box helicase 28                                                 | 34503957        | 34505594        | 94   | 183    | 101  | 156  | 0.65 | CN1 | -1 |
| BxN5        | 18        | XP_019835375        | IRF2BP1        | interferon regulatory factor 2 binding protein 1                     | 53187755        | 53189428        | 51   | 229    | 103  | 152  | 0,68 | CN1 | -1 |
| BxN5        | 18        | XP_019835622        | KMT5C          | lysine methyltransferase 5C                                          | 62527037        | 62531741        | 81   | 396    | 163  | 249  | 0,65 | CN1 | -1 |
| BxN5        | 18        | XP_019833801        | LOC109571719   | F-box only protein 27-like                                           | 48354921        | 48357943        | 138  | 280    | 278  | 192  | 1,45 | CN3 | -1 |
| NxB1        | 18        | XP_019833821        | LOC109571739   | carcinoembryonic antigen-related cell adhesion molecule 6-like       | 51153775        | 51195885        | 6308 | 7325   | 5637 | 7968 | 0.71 | CN1 | -1 |
| NxB1        | 18        | XP_019833877        | LOC109571798   | zinc finger protein 724-like                                         | 57249434        | 57257410        | 1484 | 2403.5 | 1326 | 2187 | 0.61 | CN1 | -1 |
| BxN3        | 18        | XP_019833912        | LOC109571838   | cationic amino acid transporter 3-like                               | 61388529        | 61401929        | 2771 | 2252   | 2403 | 1655 | 1.45 | CN3 | -1 |
| NxB1        | 18        | XP_019833935        | LOC109571861   | leukocyte immunoglobulin-like receptor subfamily A member 6          | 62959168        | 62964097        | 281  | 353.5  | 251  | 376  | 0.67 | CN1 | -1 |
| NxB1        | 18        | XP_019833985        | LOC109571908   | zinc finger protein 420-like                                         | 57177877        | 57184068        | 1190 | 1818.5 | 1063 | 1667 | 0.64 | CN1 | -1 |
| BxN5        | 18        | XP_019834125        | LOC109572041   | leukocyte immunoglobulin-like receptor subfamily A member 6          | 63038725        | 63139881        | 1477 | 6223   | 2974 | 4139 | 0,72 | CN1 | -1 |
| NxB2        | 18        | XP_019835458        | LOC109572793   | cationic amino acid transporter 3-like                               | 61057218        | 61058634        | 144  | 193    | 134  | 210  | 0.64 | CN1 | -1 |
| NxB1        | 18        | XP_019835644        | LOC109572916   | cationic amino acid transporter 3-like                               | 61411652        | 61418513        | 1206 | 1379.5 | 1078 | 1748 | 0.62 | CN1 | -1 |
| NxB2        | 18        | XP_019835644        | LOC109572916   | cationic amino acid transporter 3-like                               | 61411652        | 61418513        | 1067 | 1379.5 | 995  | 1660 | 0.6  | CN1 | -1 |
| BxN4        | 18        | XP_019835794        | LOC109573033   | carbohydrate sulfotransferase 6                                      | 2243625         | 2244812         | 52   | 104.5  | 56   | 92   | 0.61 | CN1 | -1 |
| BxN5        | 18        | XP_019835806        | LOC109573039   | transducin-like enhancer protein 4                                   | 38738501        | 38742016        | 74   | 347    | 149  | 229  | 0,65 | CN1 | -1 |
| BxN5        | 18        | XP_019834730        | POLR2I         | RNA polymerase II subunit I                                          | 46201941        | 46203132        | 26   | 137    | 52   | 83   | 0,63 | CN1 | -1 |
| NxB1        | 18        | XP_019833674        | RGS9BP         | regulator of G protein signaling 9 binding protein                   | 42168835        | 42169548        | 63   | 90.5   | 56   | 88   | 0.64 | CN1 | -1 |
| BxN5        | 18        | XP_019835389        | RRAD           | RRAD, Ras related glycolysis inhibitor and calcium channel regulator | 33646184        | 33648658        | 49   | 229    | 99   | 152  | 0,65 | CN1 | -1 |
| BxN4        | 18        | XP_019835823        | SBK2           | SH3 domain binding kinase family member 2                            | 62384363        | 62388769        | 212  | 426    | 229  | 352  | 0.65 | CN1 | -1 |
| BxN4        | 18        | XP_019835825        | SBK2           | SH3 domain binding kinase family member 2                            | 62385279        | 62388769        | 176  | 344    | 190  | 292  | 0.65 | CN1 | -1 |
| BxN4        | 18        | XP_019833725        | UBE2M          | ubiquitin conjugating enzyme E2 M                                    | 65909815        | 65912126        | 112  | 230    | 121  | 202  | 0.6  | CN1 | -1 |
| BxN3        | 18        | XP_019835202        | ZNF524         | zinc finger protein 524                                              | 62338136        | 62338933        | 138  | 81.5   | 120  | 82   | 1.46 | CN3 | -1 |
| NxB2        | 18        | XP_019833966        | ZSCAN22        | zinc finger and SCAN domain containing 22                            | 65765398        | 65765973        | 58   | 67     | 54   | 82   | 0.66 | CN1 | -1 |
| BxN5        | 18        | XP_019833963        | ZSCAN4         | zinc finger and SCAN domain containing 4                             | 65225457        | 65226922        | 33   | 146    | 66   | 97   | 0,68 | CN1 | -1 |
| BxN3        | 19        | XP_019836996        | AKAP1          | A-kinase anchoring protein 1                                         | 7171111         | 7182495         | 351  | 211    | 304  | 225  | 1.35 | CN3 | -1 |
| BxN4        | 19        | XP_019836425        | CCDC182        | coiled-coil domain containing 182                                    | 7789555         | 7790016         | 26   | 59     | 28   | 52   | 0.54 | CN1 | -1 |
| BxN5        | 19        | XP_019836514        | CDK3           | cyclin dependent kinase 3                                            | 57366146        | 57369178        | 57   | 291    | 115  | 184  | 0,62 | CN1 | -1 |
| NxB1        | 19        | XP_019838198        | GJD3           | gap junction protein delta 3                                         | 41869527        | 41870381        | 54   | 80.5   | 48   | 84   | 0.57 | CN1 | -1 |
| BxN5        | 19        | XP_019837051        | GPS1           | G protein pathway suppressor 1                                       | 52297747        | 52301611        | 61   | 279    | 123  | 186  | 0,66 | CN1 | -1 |
| BxN4        | 19        | XP_019836259        | HES7           | hes family bHLH transcription factor 7                               | 28307250        | 28309723        | 108  | 232    | 116  | 205  | 0.57 | CN1 | -1 |
| BxN5        | 19        | XP_019836259        | HES7           | hes family bHLH transcription factor 7                               | 28307250        | 28309723        | 40   | 222    | 81   | 147  | 0,55 | CN1 | -1 |
| BxN4        | 19        | XP_019837098        | ICAM2          | intercellular adhesion molecule 2                                    | 49766254        | 49780083        | 2383 | 2265   | 2569 | 1828 | 1.41 | CN3 | -1 |
| BxN3        | 19        | XP_019837981        | KRT19          | keratin 19                                                           | 43089404        | 43093048        | 544  | 330    | 472  | 341  | 1.38 | CN3 | -1 |

|      |    |              |              |                                                                     |          |          |      |       |      |      |      |     |    |
|------|----|--------------|--------------|---------------------------------------------------------------------|----------|----------|------|-------|------|------|------|-----|----|
| BxN5 | 19 | XP_019835983 | LOC109573255 | protein shisa-6 homolog                                             | 30535651 | 30699737 | 8786 | 39457 | 1769 | 2619 | 0,68 | CN1 | -1 |
| BxN4 | 19 | XP_019836080 | LOC109573358 | CMRF35-like molecule 6                                              | 58635110 | 58637647 | 150  | 277.5 | 162  | 285  | 0,57 | CN1 | -1 |
| BxN5 | 19 | XP_019836080 | LOC109573358 | CMRF35-like molecule 6                                              | 58635110 | 58637647 | 64   | 249   | 129  | 204  | 0,63 | CN1 | -1 |
| NxB1 | 19 | XP_019836348 | LOC109573545 | olfactory receptor 4D2-like                                         | 8191585  | 8192520  | 101  | 133.5 | 90   | 156  | 0,58 | CN1 | -1 |
| BxN3 | 19 | XP_019836351 | LOC109573548 | keratin-associated protein 3-1                                      | 42476426 | 42476722 | 33   | 45.5  | 29   | 51   | 0,57 | CN1 | -1 |
| BxN5 | 19 | XP_019837572 | LOC109574185 | C-C motif chemokine 14-like                                         | 13922731 | 13926942 | 97   | 464   | 195  | 309  | 0,63 | CN1 | -1 |
| BxN4 | 19 | XP_019837289 | MRPL38       | mitochondrial ribosomal protein L38                                 | 57442569 | 57446882 | 255  | 498.5 | 275  | 425  | 0,65 | CN1 | -1 |
| BxN4 | 19 | XP_019836963 | ORMDL3       | ORMDL sphingolipid biosynthesis regulator 3                         | 41523157 | 41524726 | 118  | 209.5 | 127  | 198  | 0,64 | CN1 | -1 |
| BxN5 | 19 | XP_019837943 | PPP1R1B      | protein phosphatase 1 regulatory inhibitor subunit 1B               | 41265609 | 41273060 | 154  | 690   | 310  | 459  | 0,68 | CN1 | -1 |
| BxN5 | 19 | XP_019837863 | RANGRF       | RAN guanine nucleotide release factor                               | 28447743 | 28448890 | 28   | 141   | 56   | 85   | 0,66 | CN1 | -1 |
| BxN4 | 19 | XP_019837109 | SCRN2        | secernin 2                                                          | 39865977 | 39869076 | 176  | 328   | 190  | 289  | 0,66 | CN1 | -1 |
| BxN5 | 19 | XP_019837109 | SCRN2        | secernin 2                                                          | 39865977 | 39869076 | 67   | 316   | 135  | 206  | 0,66 | CN1 | -1 |
| BxN4 | 19 | XP_019835972 | SLC35G6      | solute carrier family 35 member G6                                  | 27564204 | 27565790 | 90   | 166.5 | 97   | 140  | 0,69 | CN1 | -1 |
| BxN4 | 19 | XP_019836924 | SRSF1        | serine and arginine rich splicing factor 1                          | 8031319  | 8033041  | 117  | 210.5 | 126  | 188  | 0,67 | CN1 | -1 |
| BxN5 | 19 | XP_019837431 | TMEM95       | transmembrane protein 95                                            | 27433322 | 27434741 | 32   | 156   | 64   | 104  | 0,62 | CN1 | -1 |
| BxN5 | 19 | XP_019837433 | TMEM95       | transmembrane protein 95                                            | 27433265 | 27434590 | 30   | 150   | 60   | 100  | 0,6  | CN1 | -1 |
| BxN5 | 19 | XP_019837430 | TMEM95       | transmembrane protein 95                                            | 27433322 | 27434498 | 27   | 134   | 54   | 89   | 0,61 | CN1 | -1 |
| BxN5 | 19 | XP_019836533 | TNFSF13      | TNF superfamily member 13                                           | 27795678 | 27797516 | 49   | 235   | 99   | 156  | 0,63 | CN1 | -1 |
| BxN3 | 20 | XP_019838522 | LOC109574933 | hydroxymethylglutaryl-CoA synthase, cytoplasmic                     | 33442121 | 33449918 | 59   | 71    | 51   | 87   | 0,59 | CN1 | -1 |
| BxN5 | 20 | XP_019838542 | LOC109574946 | hydroxymethylglutaryl-CoA synthase, cytoplasmic-like                | 33465780 | 33483794 | 24   | 116   | 48   | 77   | 0,62 | CN1 | -1 |
| BxN4 | 20 | XP_019838442 | RAI14        | retinoic acid induced 14                                            | 41718533 | 41779308 | 7553 | 7340  | 8143 | 6049 | 1,35 | CN3 | -1 |
| BxN5 | 21 | XP_019839515 | HDDC3        | HD domain containing 3                                              | 21478756 | 21480017 | 29   | 142   | 58   | 94   | 0,62 | CN1 | -1 |
| BxN5 | 21 | XP_019839516 | HDDC3        | HD domain containing 3                                              | 21478756 | 21479940 | 28   | 135   | 56   | 90   | 0,62 | CN1 | -1 |
| BxN5 | 21 | XP_019838900 | INSM2        | INSM transcriptional repressor 2                                    | 46610927 | 46612591 | 29   | 157   | 58   | 99   | 0,59 | CN1 | -1 |
| NxB1 | 21 | XP_019839396 | ISLR         | immunoglobulin superfamily containing leucine rich repeat           | 34587991 | 34589277 | 153  | 113   | 137  | 94   | 1,46 | CN3 | -1 |
| BxN3 | 21 | XP_019839411 | LOC109575609 | myeloid-associated differentiation marker-like                      | 19721269 | 19722168 | 179  | 108   | 155  | 108  | 1,44 | CN3 | -1 |
| BxN5 | 21 | XP_019839564 | LOC109575719 | duodenase-1-like                                                    | 34881466 | 34883387 | 21   | 106   | 42   | 67   | 0,63 | CN1 | -1 |
| BxN3 | 21 | XP_019839597 | LOC109575751 | interferon alpha-inducible protein 27-like protein 2                | 59063083 | 59065164 | 229  | 137.5 | 199  | 143  | 1,39 | CN3 | -1 |
| BxN4 | 22 | XP_019840390 | ABTB1        | ankyrin repeat and BTB domain containing 1                          | 61807382 | 61810559 | 145  | 288   | 156  | 244  | 0,64 | CN1 | -1 |
| BxN4 | 22 | XP_019840490 | CCDC51       | coiled-coil domain containing 51                                    | 52679199 | 52682107 | 195  | 358   | 210  | 322  | 0,65 | CN1 | -1 |
| NxB1 | 22 | XP_019839661 | LOC109575847 | uncharacterized LOC109575847                                        | 20116426 | 20117625 | 78   | 109   | 70   | 119  | 0,59 | CN1 | -1 |
| BxN4 | 22 | XP_019839762 | LOC109575948 | cathelicidin-5                                                      | 52950138 | 52951988 | 80   | 154   | 86   | 131  | 0,66 | CN1 | -1 |
| NxB2 | 22 | XP_019839837 | LOC109576004 | IQ domain-containing protein F5                                     | 50047456 | 50048293 | 63   | 83.5  | 59   | 93   | 0,63 | CN1 | -1 |
| BxN5 | 22 | XP_019840383 | LOC109576262 | protein shisa-5                                                     | 52713795 | 52715843 | 31   | 169   | 62   | 112  | 0,55 | CN1 | -1 |
| BxN5 | 22 | XP_019840574 | LOC109576397 | C-C chemokine receptor type 1                                       | 54633540 | 54634607 | 54   | 113   | 109  | 75   | 1,45 | CN3 | -1 |
| BxN5 | 22 | XP_019840596 | LOC109576413 | solute carrier family 26 member 6-like                              | 52302230 | 52312701 | 32   | 167   | 64   | 101  | 0,63 | CN1 | -1 |
| BxN5 | 22 | XP_019840597 | LOC109576413 | solute carrier family 26 member 6-like                              | 52301403 | 52312701 | 32   | 168   | 64   | 102  | 0,63 | CN1 | -1 |
| BxN5 | 22 | XP_019840598 | LOC109576413 | solute carrier family 26 member 6-like                              | 52304357 | 52312701 | 30   | 158   | 60   | 96   | 0,62 | CN1 | -1 |
| NxB2 | 22 | XP_019839898 | RPL29        | ribosomal protein L29                                               | 49980095 | 49981722 | 133  | 203   | 124  | 203  | 0,61 | CN1 | -1 |
| BxN5 | 22 | XP_019839801 | XIRP1        | xin actin binding repeat containing 1                               | 12657435 | 12661167 | 63   | 314   | 127  | 209  | 0,61 | CN1 | -1 |
| NxB2 | 23 | XP_019840902 | LOC109576700 | olfactory receptor 2G3-like                                         | 29378100 | 29379044 | 104  | 131.5 | 97   | 142  | 0,68 | CN1 | -1 |
| NxB2 | 23 | XP_019840925 | LOC109576728 | putative olfactory receptor 2W6                                     | 30859096 | 30860052 | 69   | 107   | 64   | 111  | 0,58 | CN1 | -1 |
| BxN5 | 23 | XP_019840953 | LOC109576768 | protein FAM177A1-like                                               | 29520416 | 29521051 | 10   | 58    | 20   | 39   | 0,51 | CN1 | -1 |
| BxN3 | 23 | XP_019840954 | LOC109576769 | interferon-induced transmembrane protein 3-like                     | 27702658 | 27703095 | 390  | 236   | 338  | 238  | 1,42 | CN3 | -1 |
| NxB1 | 23 | XP_019841058 | LOC109576861 | butyrophilin subfamily 1 member A1-like                             | 26451228 | 26458858 | 56   | 85.5  | 50   | 79   | 0,63 | CN1 | -1 |
| BxN4 | 23 | XP_019841114 | LOC109576914 | histone H4                                                          | 31696818 | 31697129 | 26   | 55    | 28   | 48   | 0,58 | CN1 | -1 |
| NxB1 | 23 | XP_019841118 | LOC109576917 | histone H4                                                          | 31964359 | 31964670 | 36   | 47.5  | 32   | 53   | 0,6  | CN1 | -1 |
| NxB2 | 23 | XP_019841177 | LOC109576960 | olfactory receptor 12D2-like                                        | 29187404 | 29188318 | 104  | 192.5 | 97   | 169  | 0,57 | CN1 | -1 |
| BxN4 | 23 | XP_019841310 | LOC109577026 | heat shock 70 kDa protein 1A                                        | 27266576 | 27268501 | 196  | 371.5 | 211  | 305  | 0,69 | CN1 | -1 |
| BxN3 | 23 | XP_019841328 | LOC109577039 | SLA class II histocompatibility antigen, DQ haplotype D alpha chain | 26144727 | 26199179 | 672  | 787.5 | 583  | 903  | 0,65 | CN1 | -1 |



|      |    |              |              |                                                                     |          |          |       |        |       |       |      |     |    |
|------|----|--------------|--------------|---------------------------------------------------------------------|----------|----------|-------|--------|-------|-------|------|-----|----|
| BxN4 | 23 | XP_019841328 | LOC109577039 | SLA class II histocompatibility antigen, DQ haplotype D alpha chain | 26144727 | 26199179 | 472   | 787.5  | 509   | 802   | 0.63 | CN1 | -1 |
| BxN5 | 23 | XP_019841328 | LOC109577039 | SLA class II histocompatibility antigen, DQ haplotype D alpha chain | 26144727 | 26199179 | 174   | 672    | 350   | 572   | 0,61 | CN1 | -1 |
| NxB1 | 23 | XP_019841395 | LOC109577084 | MHC class I polypeptide-related sequence B-like                     | 27768689 | 27772990 | 369   | 389.5  | 330   | 465   | 0.71 | CN1 | -1 |
| NxB1 | 23 | XP_019841397 | LOC109577084 | MHC class I polypeptide-related sequence B-like                     | 27768689 | 27772849 | 367   | 384.5  | 328   | 456   | 0.72 | CN1 | -1 |
| BxN4 | 23 | XP_019841406 | LOC109577088 | BOLA class I histocompatibility antigen, alpha chain BL3-7          | 28611091 | 28614018 | 200   | 294    | 216   | 329   | 0.66 | CN1 | -1 |
| BxN5 | 24 | XP_019842014 | LOC109577699 | serpin B4-like                                                      | 64737527 | 64745439 | 148   | 790    | 298   | 498   | 0,6  | CN1 | -1 |
| BxN3 | 24 | XP_019842037 | LOC109577723 | serpin B4-like                                                      | 64487772 | 64494223 | 712   | 552.5  | 617   | 454   | 1.36 | CN3 | -1 |
| BxN5 | 25 | XP_019843323 | AMDHD2       | amidohydrolase domain containing 2                                  | 2527277  | 2532661  | 116   | 515    | 234   | 343   | 0,68 | CN1 | -1 |
| BxN4 | 25 | XP_019842595 | ARHGDI3      | Rho GDP dissociation inhibitor gamma                                | 756307   | 760174   | 187   | 356    | 202   | 314   | 0.64 | CN1 | -1 |
| BxN5 | 25 | XP_019843324 | ATP6VOC      | ATPase H+ transporting V0 subunit c                                 | 2521811  | 2526515  | 97    | 460    | 195   | 306   | 0,64 | CN1 | -1 |
| BxN4 | 25 | XP_019843329 | BRICD5       | BRICHOS domain containing 5                                         | 2250272  | 2251704  | 84    | 167    | 91    | 144   | 0.63 | CN1 | -1 |
| BxN4 | 25 | XP_019843692 | CIITA        | class II major histocompatibility complex transactivator            | 10600555 | 10645081 | 3590  | 6140   | 3871  | 6146  | 0.63 | CN1 | -1 |
| BxN4 | 25 | XP_019843693 | CIITA        | class II major histocompatibility complex transactivator            | 10602114 | 10645081 | 3495  | 5944.5 | 3768  | 5948  | 0.63 | CN1 | -1 |
| BxN5 | 25 | XP_019843692 | CIITA        | class II major histocompatibility complex transactivator            | 10600555 | 10645081 | 1456  | 5688   | 2932  | 4385  | 0,67 | CN1 | -1 |
| BxN5 | 25 | XP_019843693 | CIITA        | class II major histocompatibility complex transactivator            | 10602114 | 10645081 | 1403  | 5510   | 2825  | 4243  | 0,67 | CN1 | -1 |
| BxN5 | 25 | XP_019843883 | DCTPP1       | dCTP pyrophosphatase 1                                              | 28400227 | 28403655 | 72    | 350    | 145   | 216   | 0,67 | CN1 | -1 |
| BxN4 | 25 | XP_019843607 | HCF1R1       | host cell factor C1 regulator 1                                     | 2999407  | 3000478  | 70    | 134.5  | 75    | 114   | 0.66 | CN1 | -1 |
| BxN5 | 25 | XP_019843506 | INO80E       | INO80 complex subunit E                                             | 28055974 | 28060100 | 98    | 431    | 197   | 287   | 0,69 | CN1 | -1 |
| BxN5 | 25 | XP_019843507 | INO80E       | INO80 complex subunit E                                             | 28053584 | 28060100 | 145   | 645    | 292   | 429   | 0,68 | CN1 | -1 |
| NxB1 | 25 | XP_019842592 | LOC109578041 | liprin-alpha-1-like                                                 | 268692   | 422046   | 4E+05 | 306194 | 36279 | 29398 | 1.23 | CN0 | -1 |
| BxN5 | 25 | XP_019842714 | LOC109578155 | olfactory receptor 7A17-like                                        | 29356523 | 29357491 | 34    | 170    | 68    | 113   | 0,6  | CN1 | -1 |
| NxB1 | 25 | XP_019843857 | LOC109578789 | F-box only protein 16-like                                          | 286973   | 314774   | 79259 | 59073  | 7082  | 5574  | 1.27 | CN3 | -1 |
| BxN4 | 25 | XP_019843955 | LOC109578876 | zymogen granule protein 16 homolog B-like                           | 2770282  | 2772312  | 104   | 212    | 112   | 205   | 0.55 | CN1 | -1 |
| BxN5 | 25 | XP_019843689 | METR1        | meteorin, glial cell differentiation regulator                      | 1065623  | 1067615  | 41    | 209    | 83    | 127   | 0,65 | CN1 | -1 |
| BxN5 | 25 | XP_019842597 | NHLRC4       | NHL repeat containing 4                                             | 948296   | 951131   | 56    | 272    | 113   | 175   | 0,65 | CN1 | -1 |
| BxN4 | 25 | XP_019843734 | PKMYT1       | protein kinase, membrane associated tyrosine/threonine 1            | 2937355  | 2941433  | 189   | 432.5  | 204   | 379   | 0.54 | CN1 | -1 |
| BxN4 | 25 | XP_019843428 | PPP1R35      | protein phosphatase 1 regulatory subunit 35                         | 38189574 | 38190646 | 50    | 104    | 54    | 91    | 0.59 | CN1 | -1 |
| BxN4 | 25 | XP_019842596 | PRR35        | proline rich 35                                                     | 946168   | 948155   | 162   | 154.5  | 175   | 125   | 1.4  | CN3 | -1 |
| BxN5 | 25 | XP_019842588 | PRSS22       | serine protease 22                                                  | 2732522  | 2736853  | 97    | 440    | 195   | 293   | 0,67 | CN1 | -1 |
| BxN5 | 26 | XP_019808432 | CUEDC2       | CUE domain containing 2                                             | 23609262 | 23610856 | 36    | 177    | 72    | 126   | 0,57 | CN1 | -1 |
| BxN4 | 26 | XP_019808615 | DMBT1        | deleted in malignant brain tumors 1                                 | 43114715 | 43173036 | 8908  | 8477   | 9604  | 6837  | 1.4  | CN3 | -1 |
| BxN5 | 26 | XP_019808615 | DMBT1        | deleted in malignant brain tumors 1                                 | 43114715 | 43173036 | 3270  | 8056   | 6585  | 4877  | 1,35 | CN3 | -1 |
| NxB2 | 27 | XP_019809087 | LOC109553490 | butyrophilin-like protein 2                                         | 6409172  | 6422518  | 180   | 278.5  | 168   | 253   | 0.66 | CN1 | -1 |
| BxN5 | 28 | XP_019809575 | COMTD1       | catechol-O-methyltransferase domain containing 1                    | 30374394 | 30376254 | 43    | 207    | 87    | 125   | 0,7  | CN1 | -1 |
| BxN4 | 28 | XP_019809845 | FXSD4        | FXSD domain containing ion transport regulator 4                    | 12490639 | 12491870 | 62    | 137.5  | 67    | 121   | 0.55 | CN1 | -1 |
| BxN4 | 28 | XP_019809674 | LOC109553863 | pulmonary surfactant-associated protein D                           | 35119694 | 35120068 | 20    | 42     | 22    | 40    | 0.55 | CN1 | -1 |
| BxN5 | 29 | XP_019810739 | AP5B1        | adaptor related protein complex 5 subunit beta 1                    | 45870975 | 45873711 | 58    | 281    | 117   | 185   | 0,63 | CN1 | -1 |
| BxN5 | 29 | XP_019810392 | GPR137       | G protein-coupled receptor 137                                      | 44379581 | 44382203 | 51    | 257    | 103   | 160   | 0,64 | CN1 | -1 |
| BxN4 | 29 | XP_019809862 | LOC109553987 | upstream-binding factor 1-like protein 1                            | 5521064  | 5521951  | 81    | 159.5  | 87    | 137   | 0.64 | CN1 | -1 |
| BxN4 | 29 | XP_019809865 | LOC109553989 | PRAME family member 8-like                                          | 5601743  | 5604477  | 1682  | 3356   | 1813  | 2920  | 0.62 | CN1 | -1 |
| BxN4 | 29 | XP_019809866 | LOC109553991 | upstream-binding factor 1-like protein 1                            | 5644316  | 5645530  | 37    | 81.5   | 40    | 71    | 0.56 | CN1 | -1 |
| BxN5 | 29 | XP_019809868 | LOC109553995 | upstream-binding factor 1-like protein 1                            | 5729657  | 5730871  | 31    | 142    | 62    | 94    | 0,66 | CN1 | -1 |
| BxN4 | 29 | XP_019809870 | LOC109553996 | tripartite motif-containing protein 64-like                         | 5743698  | 5752631  | 1524  | 3089.5 | 1643  | 2675  | 0.61 | CN1 | -1 |
| BxN4 | 29 | XP_019809871 | LOC109553997 | tripartite motif-containing protein 43-like                         | 5782921  | 5789192  | 1842  | 3528.5 | 1986  | 3030  | 0.66 | CN1 | -1 |
| NxB1 | 29 | XP_019809901 | LOC109554033 | putative olfactory receptor 8G3 pseudogene                          | 28251977 | 28252912 | 30    | 48.5   | 27    | 45    | 0.6  | CN1 | -1 |
| BxN5 | 29 | XP_019809915 | LOC109554053 | putative olfactory receptor 8G3 pseudogene                          | 28914465 | 28915388 | 26    | 125    | 52    | 79    | 0,66 | CN1 | -1 |
| NxB1 | 29 | XP_019810098 | LOC109554217 | olfactory receptor 8B3-like                                         | 28732247 | 28733173 | 153   | 223.5  | 137   | 208   | 0.66 | CN1 | -1 |
| BxN5 | 29 | XP_019810119 | LOC109554241 | olfactory receptor 8B3-like                                         | 29103319 | 29104248 | 27    | 133    | 54    | 88    | 0,61 | CN1 | -1 |
| NxB1 | 29 | XP_019810207 | LOC109554300 | tripartite motif-containing protein 64-like                         | 5551374  | 5561398  | 1197  | 880.5  | 1070  | 809   | 1.32 | CN3 | -1 |
| NxB2 | X  | XP_019811858 | ARMCX1       | armadillo repeat containing X-linked 1                              | 30880957 | 30882318 | 51    | 73.5   | 48    | 75    | 0.64 | CN1 | -1 |

|      |   |              |              |                                                                            |          |          |      |      |      |      |      |     |    |
|------|---|--------------|--------------|----------------------------------------------------------------------------|----------|----------|------|------|------|------|------|-----|----|
| NxB2 | X | XP_019810987 | LOC109554802 | PWWP domain-containing protein MUM1L1-like                                 | 22852889 | 22854949 | 259  | 374  | 241  | 357  | 0.68 | CN1 | -1 |
| NxB2 | X | XP_019811167 | LOC109555062 | nuclear RNA export factor 3-like                                           | 60822811 | 60831615 | 7532 | 6157 | 7023 | 5064 | 1.39 | CN3 | -1 |
| NxB1 | X | XP_019811560 | LOC109555266 | transcription elongation factor A N-terminal and central domain-containing | 81170156 | 81171292 | 46   | 55   | 41   | 66   | 0.62 | CN1 | -1 |
| BxN5 | X | XP_019811929 | LOC109555466 | protein Shroom2-like                                                       | 86251392 | 86254034 | 33   | 169  | 66   | 111  | 0,59 | CN1 | -1 |
| BxN3 | X | XP_019812026 | RAB9B        | RAB9B, member RAS oncogene family                                          | 33981816 | 33982421 | 41   | 50   | 36   | 62   | 0.58 | CN1 | -1 |
| BxN4 | X | XP_019812026 | RAB9B        | RAB9B, member RAS oncogene family                                          | 33981816 | 33982421 | 29   | 50   | 31   | 55   | 0.56 | CN1 | -1 |
| BxN5 | X | XP_019812004 | SLITRK4      | SLIT and NTRK like family member 4                                         | 15753773 | 15756286 | 26   | 132  | 52   | 88   | 0,59 | CN1 | -1 |

---
